# Supplementary material for: Joint experimental and computational 17O solid state NMR study of Brownmillerite Ba2In2O5
Source: Royal Society of Chemistry journal article supplement (doi:10.1039/c3cp53642d), 2013-12-03
Supplement: c3cp53642d.pdf [file c3cp53642d.pdf]

Cite this: DOI: 10.1039/c0xx00000x

[www.rsc.org/xxxxxx](http://www.rsc.org/xxxxxx)

ARTICLE TYPE

## Supplementary Information for

# Joint Experimental and Computational $^{17}\text{O}$ Solid State NMR Study of Brownmillerite $\text{Ba}_2\text{In}_2\text{O}_5$

Rıza Dervişoğlu,<sup>a,b</sup> Derek S. Middlemiss,<sup>a,b</sup> Frédéric Blanc,<sup>b</sup> Lesley A. Holmes,<sup>a</sup> Yueh-Lin Lee,<sup>c</sup> Dane Morgan,<sup>c</sup>  
Clare P. Grey<sup>a,b,\*</sup>

<sup>a</sup>Department of Chemistry, Stony Brook University, Stony Brook, NY 11794-3400, USA

<sup>b</sup>Department of Chemistry, University of Cambridge, Lensfield Road, Cambridge CB2 1EW, UK

<sup>c</sup>Department of Materials Science and Engineering, University of Wisconsin, Madison, WI 53706, USA

\*Author to whom correspondence should be addressed. E-mail: [cpg27@cam.ac.uk](mailto:cpg27@cam.ac.uk)

## Table of Contents

|                                                                                                                     |            |
|---------------------------------------------------------------------------------------------------------------------|------------|
| <b>1. Additional Figures</b>                                                                                        | <b>p3</b>  |
| <b>2. List of CIF structural files of all DFT calculated configurations and<br/>respective CASTEP GIPAW outputs</b> | <b>p6</b>  |
| <b>3. References for supplementary information</b>                                                                  | <b>p23</b> |

## 1. Additional Figures.

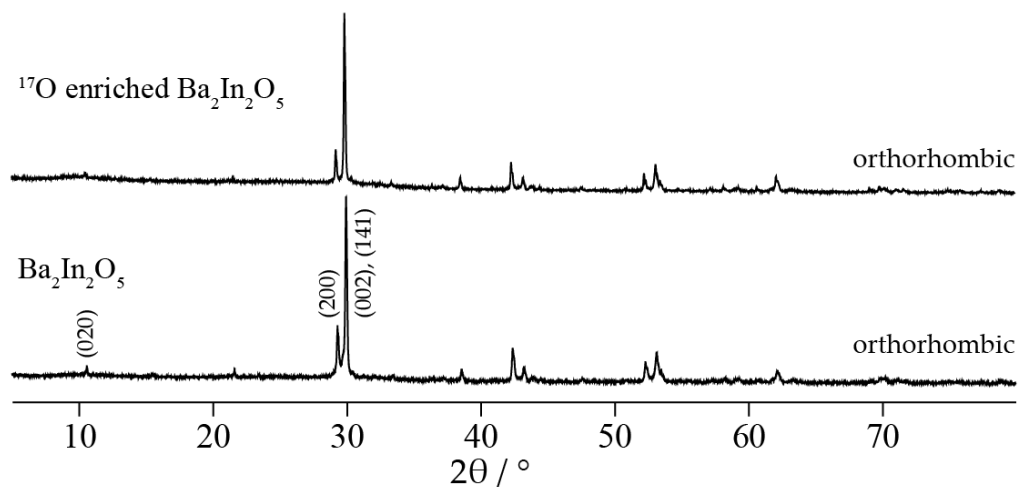

**Figure S1.** Powder x-ray diffraction patterns of  $\text{Ba}_2\text{In}_2\text{O}_5$  and  $^{17}\text{O}$  enriched  $\text{Ba}_2\text{In}_2\text{O}_5$ .

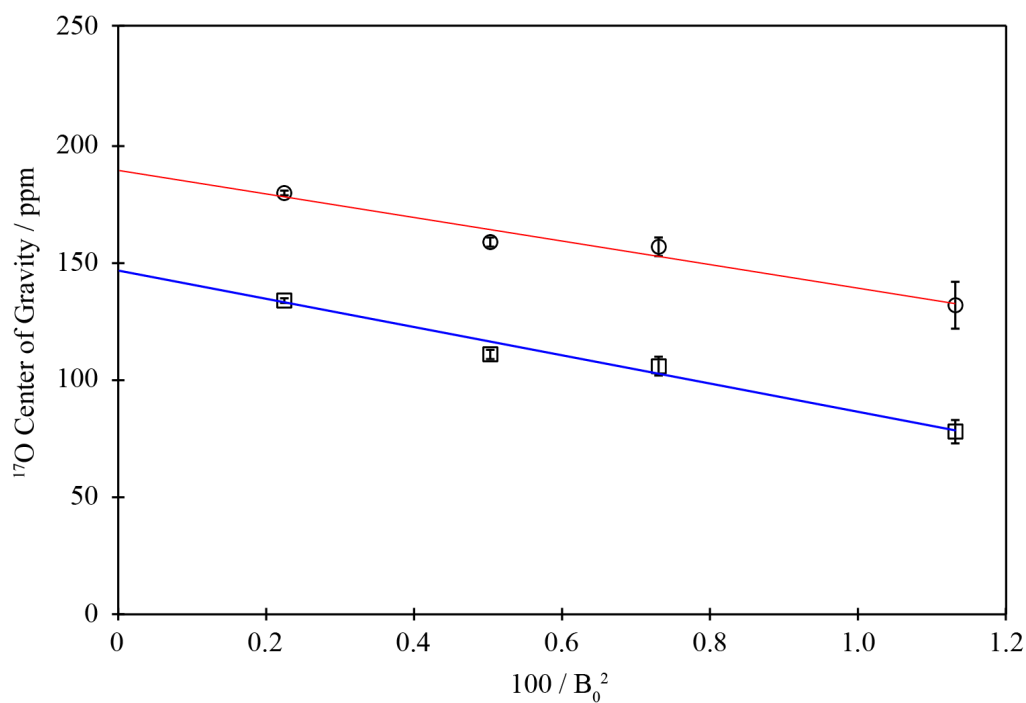

**Figure S2.** Variable  $B_0$  field dependence of the  $^{17}\text{O}$  MAS NMR shifts of the centre of gravity of two  $^{17}\text{O}$  signals in  $\text{Ba}_2\text{In}_2\text{O}_5$ . The straight lines denote least squares fits, yielding isotropic chemical shifts of 189 (8) and 146 (8) ppm for the high and low shift of the  $^{17}\text{O}$  sites, respectively.

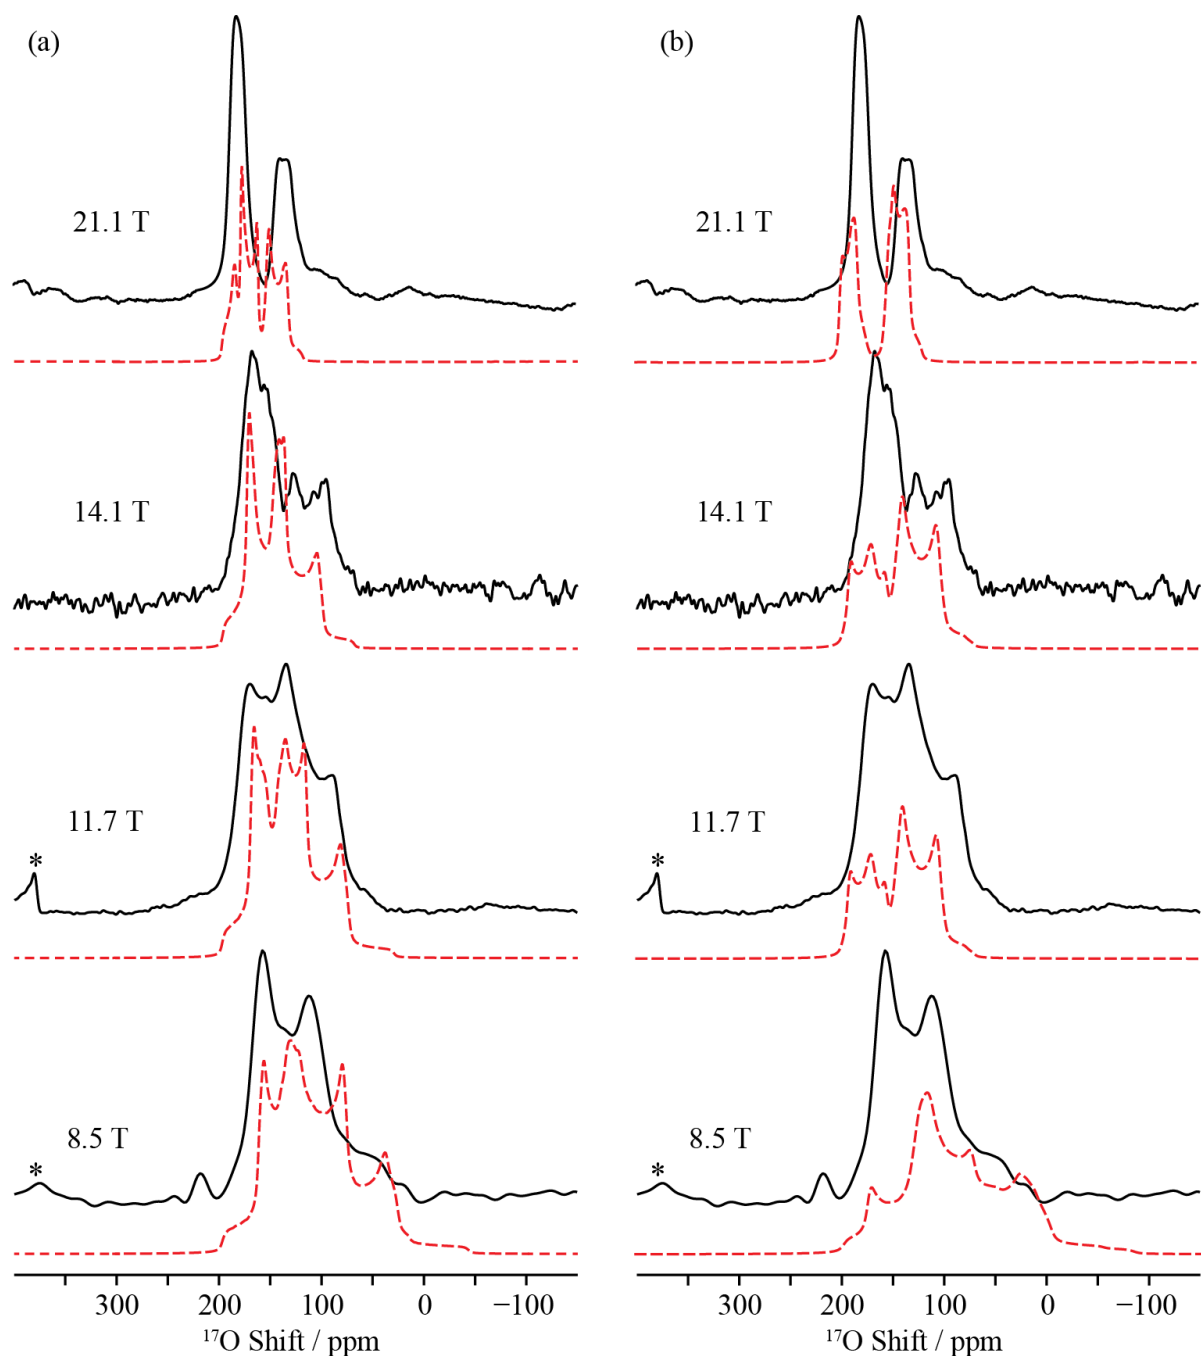

**Figure S3.** Comparison of the experimental (full lines)  $^{17}\text{O}$  MAS NMR spectra of  $\text{Ba}_2\text{In}_2\text{O}_5$  and the simulation (red dashed lines) of the GIPAW calculated  $^{17}\text{O}$  NMR spectra of computed  $\text{Ba}_2\text{In}_2\text{O}_5$  in (a) the ground state  $\cdots\text{OctTetOctTet}'\cdots$  staggered oxygen vacancy configuration and (b) the first excited state  $\cdots\text{OctTetOctTet}\cdots$  stacked oxygen vacancy configuration as a function of magnetic field strengths. The asterisks denote the oxygen signal from the  $\text{ZrO}_2$  rotor.<sup>1</sup>

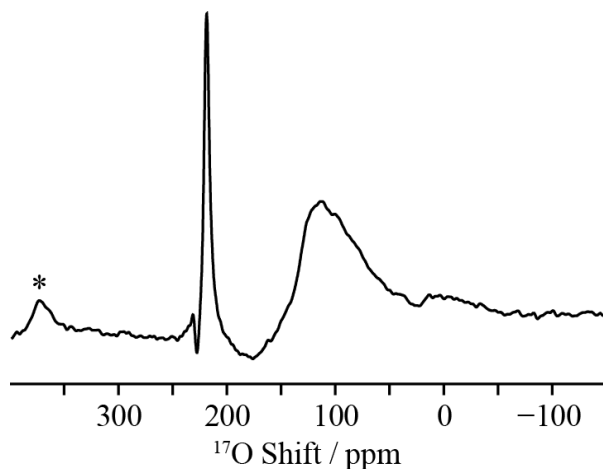

**Figure S4.**  $^{17}\text{O}$  MAS NMR spectrum of  $^{17}\text{O}$  enriched  $\text{Ba}_2\text{In}_2\text{O}_4(\text{OH})_2$  at 9.4 T obtained using a 3  $\mu\text{s}$  pulse length corresponding to  $\pi/2$  pulse at a radio frequency field amplitude of 80 kHz as measurement in liquid water. The lineshape distortion of the broad site at  $\sim 100$  ppm arise from the long pulse length used in this experiment.<sup>2</sup> The asterisks denote the oxygen signal from the  $\text{ZrO}_2$  rotor.<sup>1</sup>

Examining the In  $\sigma$ -values, it is found that the octahedral sites are approximately 376 ppm more shielded than the tetrahedral. The  $C_Q$ -values obtained for both In environments are very large, with magnitudes exceeding 200 MHz in each case.  $^{115}\text{In}$  studies in literature<sup>3-5</sup> show  $C_Q$  values in a range of 20-600 MHz. The  $C_Q$ -values for  $^{135/137}\text{Ba}$  sites are substantially lower, in the approximate range from 31 to 33 MHz.<sup>2</sup>

## 2. List of CIF structural files of all DFT calculated configurations and respective CASTEP GIPAW

### outputs

#### Ground state Brownmillerite structures in 'OctTetOctTet' fashion:

#=====

# CRYSTAL DATA

#-----

```
_pd_phase_name          'Ba2In2O5_NMR_011'  
_cell_length_a          6.233732  
_cell_length_b          16.898627  
_cell_length_c          6.045253  
_cell_angle_alpha       89.962339  
_cell_angle_beta        90.019619  
_cell_angle_gamma       90.007455  
_symmetry_space_group_name_H-M  'P 1 '  
_symmetry_Int_Tables_number  1
```

```
loop_  
_symmetry_equiv_pos_as_xyz  
'x, y, z'
```

```
loop_  
_atom_site_label  
_atom_site_fract_x  
_atom_site_fract_y  
_atom_site_fract_z  
O1      0.059776  0.138974  1.021450  
O2      0.946433  0.862773  0.021028  
O3      0.946170  0.638933  1.021348  
O4      0.059241  0.362858  1.021120  
O5      0.559148  0.638967  0.521359  
O6      0.446684  0.362739  0.520880  
O7      0.446942  0.138933  0.521250  
O8      0.559149  0.862686  0.521176  
O9      0.872740  0.251119  0.622392  
O10     0.133838  0.751039  0.622551  
O11     0.371248  0.750501  0.122872  
O12     0.635172  0.250554  0.122923  
O13     0.257564  0.992363  0.245803  
O14     0.748586  0.009228  0.246117  
O15     0.748006  0.492444  0.245875  
O16     0.257049  0.509267  0.245800  
O17     0.756871  0.492519  0.746008  
O18     0.247942  0.509403  0.745734  
O19     0.248667  0.992409  0.746293  
O20     0.757630  0.009347  0.745685  
In1     0.938037  0.250881  0.966905  
In2     0.068007  0.750838  0.966815  
In3     0.436938  0.750825  0.467369  
In4     0.569142  0.250864  0.467288
```

|     |           |          |           |
|-----|-----------|----------|-----------|
| In5 | 0.002663  | 0.000738 | 0.000272  |
| In6 | 1.002333  | 0.501038 | 0.000134  |
| In7 | 0.502350  | 0.500734 | 0.500394  |
| In8 | 0.502558  | 1.000965 | 0.500496  |
| Ba1 | 0.019505  | 0.110596 | 0.496780  |
| Ba2 | 0.982585  | 0.892095 | 0.498591  |
| Ba3 | -0.017698 | 0.610772 | 0.496465  |
| Ba4 | 0.019066  | 0.392480 | 0.498522  |
| Ba5 | 0.519175  | 0.610208 | -0.002544 |
| Ba6 | 0.482281  | 0.390443 | -0.001273 |
| Ba7 | 0.483296  | 0.110297 | 0.997657  |
| Ba8 | 0.519173  | 0.890538 | -0.001331 |

| Chemical Shielding and Electric Field Gradient Tensors |         |                  |          |            |            |         |     |
|--------------------------------------------------------|---------|------------------|----------|------------|------------|---------|-----|
| Species                                                | Nucleus | Shielding tensor |          |            | EFG Tensor |         | Eta |
|                                                        |         | Ion              | Iso(ppm) | Aniso(ppm) | Asym       | Cq(MHz) |     |
| O                                                      | 1       | 71.98            | -65.22   | 0.90       | -6.266E+00 | 0.13    |     |
| O                                                      | 2       | 76.06            | -62.99   | 0.82       | -6.258E+00 | 0.13    |     |
| O                                                      | 3       | 75.10            | -62.56   | 0.74       | -6.260E+00 | 0.13    |     |
| O                                                      | 4       | 72.02            | 65.99    | 1.00       | -6.267E+00 | 0.13    |     |
| O                                                      | 5       | 71.69            | -65.77   | 0.93       | -6.261E+00 | 0.13    |     |
| O                                                      | 6       | 76.67            | -61.49   | 0.73       | -6.261E+00 | 0.13    |     |
| O                                                      | 7       | 75.54            | -62.80   | 0.75       | -6.261E+00 | 0.13    |     |
| O                                                      | 8       | 72.93            | -64.98   | 0.92       | -6.263E+00 | 0.13    |     |
| O                                                      | 9       | 32.22            | 139.67   | 0.83       | -4.684E+00 | 0.89    |     |
| O                                                      | 10      | 34.67            | 136.24   | 0.86       | -4.691E+00 | 0.89    |     |
| O                                                      | 11      | 29.45            | 143.30   | 0.83       | -4.709E+00 | 0.88    |     |
| O                                                      | 12      | 32.03            | 139.44   | 0.86       | -4.711E+00 | 0.88    |     |
| O                                                      | 13      | 46.50            | -80.24   | 0.07       | -5.739E+00 | 0.05    |     |
| O                                                      | 14      | 45.61            | -80.77   | 0.07       | -5.741E+00 | 0.05    |     |
| O                                                      | 15      | 45.76            | -80.83   | 0.07       | -5.736E+00 | 0.05    |     |
| O                                                      | 16      | 46.26            | -80.57   | 0.11       | -5.742E+00 | 0.05    |     |
| O                                                      | 17      | 47.01            | -80.78   | 0.15       | -5.744E+00 | 0.06    |     |
| O                                                      | 18      | 46.65            | -81.37   | 0.09       | -5.736E+00 | 0.05    |     |
| O                                                      | 19      | 46.66            | -80.83   | 0.08       | -5.741E+00 | 0.06    |     |
| O                                                      | 20      | 46.80            | -80.85   | 0.05       | -5.740E+00 | 0.05    |     |
| In                                                     | 1       | 3070.66          | 331.56   | 0.42       | -1.967E+02 | 0.30    |     |
| In                                                     | 2       | 3069.49          | 334.41   | 0.42       | -1.968E+02 | 0.28    |     |
| In                                                     | 3       | 3069.69          | 331.32   | 0.42       | -1.959E+02 | 0.30    |     |
| In                                                     | 4       | 3069.91          | 333.45   | 0.42       | -1.957E+02 | 0.29    |     |
| In                                                     | 5       | 3446.97          | 44.40    | 0.58       | 2.034E+02  | 0.10    |     |
| In                                                     | 6       | 3447.22          | 44.74    | 0.60       | 2.026E+02  | 0.10    |     |
| In                                                     | 7       | 3447.40          | 45.50    | 0.53       | 2.029E+02  | 0.11    |     |
| In                                                     | 8       | 3447.16          | 44.95    | 0.50       | 2.029E+02  | 0.11    |     |
| Ba                                                     | 1       | 5077.39          | 274.50   | 0.23       | 3.301E+01  | 0.45    |     |
| Ba                                                     | 2       | 5074.54          | 265.40   | 0.24       | 3.268E+01  | 0.46    |     |
| Ba                                                     | 3       | 5077.75          | 269.34   | 0.24       | 3.302E+01  | 0.50    |     |
| Ba                                                     | 4       | 5073.20          | 270.36   | 0.23       | 3.266E+01  | 0.37    |     |
| Ba                                                     | 5       | 5075.54          | 274.63   | 0.23       | 3.341E+01  | 0.47    |     |
| Ba                                                     | 6       | 5080.06          | 273.56   | 0.24       | 3.332E+01  | 0.54    |     |
| Ba                                                     | 7       | 5076.73          | 269.13   | 0.23       | 3.337E+01  | 0.49    |     |
| Ba                                                     | 8       | 5078.51          | 279.73   | 0.23       | 3.359E+01  | 0.48    |     |

#=====

# CRYSTAL DATA

#-----

\_pd\_phase\_name 'Ba2In2O5\_NMR\_012'  
\_cell\_length\_a 6.23372  
\_cell\_length\_b 16.907997  
\_cell\_length\_c 6.041714  
\_cell\_angle\_alpha 90.093244  
\_cell\_angle\_beta 89.993614  
\_cell\_angle\_gamma 89.962084  
\_symmetry\_space\_group\_name\_H-M 'P 1 '  
\_symmetry\_Int\_Tables\_number 1

loop\_  
\_symmetry\_equiv\_pos\_as\_xyz  
'x, y, z'

loop\_  
\_atom\_site\_label  
\_atom\_site\_fract\_x  
\_atom\_site\_fract\_y  
\_atom\_site\_fract\_z  
O1 0.058182 0.137324 1.017964  
O2 0.945873 0.861195 0.018683  
O3 0.945821 0.637442 1.017674  
O4 0.058635 0.361151 1.017897  
O5 0.558196 0.637316 0.517918  
O6 0.445866 0.361195 0.518640  
O7 0.445828 0.137442 0.517650  
O8 0.558647 0.861144 0.518061  
O9 0.871555 0.249074 0.619589  
O10 0.133926 0.749644 0.620137  
O11 0.371549 0.749081 0.119655  
O12 0.633912 0.249647 0.120094  
O13 0.256326 0.990874 0.243739  
O14 0.747345 0.007754 0.243946  
O15 0.747304 0.490768 0.243672  
O16 0.255943 0.507552 0.244150  
O17 0.756347 0.490885 0.743674  
O18 0.247333 0.507764 0.743891  
O19 0.247326 0.990780 0.743733  
O20 0.755935 0.007562 0.744202  
In1 0.936966 0.249253 0.964296  
In2 0.068051 0.749276 0.964821  
In3 0.436984 0.749254 0.464354  
In4 0.568046 0.249274 0.464788  
In5 1.001626 0.999123 0.998345  
In6 1.001709 0.499383 0.998310  
In7 0.501626 0.499121 0.498322  
In8 0.501712 0.999386 0.498350  
Ba1 0.018827 0.107649 0.498056  
Ba2 0.982106 0.889339 0.494942  
Ba3 0.982045 0.609529 0.498313



Ba4 0.018886 0.389452 0.494908  
 Ba5 0.518826 0.607653 0.998060  
 Ba6 0.482104 0.389339 0.994928  
 Ba7 0.482043 0.109528 -0.001668  
 Ba8 0.518886 0.889452 0.994911

| Chemical Shielding and Electric Field Gradient Tensors |             |                  |            |      |            |      |     |
|--------------------------------------------------------|-------------|------------------|------------|------|------------|------|-----|
| Species                                                | Nucleus Ion | Shielding tensor |            |      | EFG Tensor |      | Eta |
|                                                        |             | Iso(ppm)         | Aniso(ppm) | Asym | Cq(MHz)    |      |     |
| O                                                      | 1           | 73.77            | 65.53      | 1.00 | -6.272E+00 | 0.12 |     |
| O                                                      | 2           | 74.63            | -63.46     | 0.74 | -6.259E+00 | 0.12 |     |
| O                                                      | 3           | 77.13            | -61.54     | 0.80 | -6.267E+00 | 0.12 |     |
| O                                                      | 4           | 71.88            | -65.94     | 0.91 | -6.270E+00 | 0.13 |     |
| O                                                      | 5           | 73.45            | 65.58      | 0.99 | -6.273E+00 | 0.12 |     |
| O                                                      | 6           | 74.43            | -63.66     | 0.74 | -6.259E+00 | 0.12 |     |
| O                                                      | 7           | 77.26            | -62.03     | 0.80 | -6.267E+00 | 0.12 |     |
| O                                                      | 8           | 71.73            | -66.16     | 0.91 | -6.270E+00 | 0.13 |     |
| O                                                      | 9           | 32.20            | 140.14     | 0.83 | -4.681E+00 | 0.90 |     |
| O                                                      | 10          | 30.80            | 141.11     | 0.85 | -4.702E+00 | 0.88 |     |
| O                                                      | 11          | 32.29            | 140.17     | 0.83 | -4.682E+00 | 0.89 |     |
| O                                                      | 12          | 30.85            | 141.23     | 0.85 | -4.703E+00 | 0.88 |     |
| O                                                      | 13          | 46.55            | -80.50     | 0.10 | -5.739E+00 | 0.05 |     |
| O                                                      | 14          | 47.06            | -80.51     | 0.07 | -5.742E+00 | 0.05 |     |
| O                                                      | 15          | 46.56            | -80.93     | 0.09 | -5.742E+00 | 0.05 |     |
| O                                                      | 16          | 46.78            | -81.43     | 0.15 | -5.743E+00 | 0.06 |     |
| O                                                      | 17          | 46.38            | -80.20     | 0.10 | -5.739E+00 | 0.05 |     |
| O                                                      | 18          | 47.02            | -80.71     | 0.07 | -5.741E+00 | 0.05 |     |
| O                                                      | 19          | 46.53            | -80.86     | 0.08 | -5.742E+00 | 0.05 |     |
| O                                                      | 20          | 46.64            | -80.87     | 0.15 | -5.743E+00 | 0.06 |     |
| In                                                     | 1           | 3069.99          | 334.99     | 0.42 | -1.974E+02 | 0.30 |     |
| In                                                     | 2           | 3069.72          | 334.37     | 0.42 | -1.960E+02 | 0.30 |     |
| In                                                     | 3           | 3070.09          | 334.67     | 0.42 | -1.974E+02 | 0.30 |     |
| In                                                     | 4           | 3069.57          | 334.47     | 0.42 | -1.960E+02 | 0.30 |     |
| In                                                     | 5           | 3446.81          | 44.88      | 0.55 | 2.043E+02  | 0.11 |     |
| In                                                     | 6           | 3447.67          | 46.14      | 0.52 | 2.051E+02  | 0.11 |     |
| In                                                     | 7           | 3447.36          | 45.04      | 0.58 | 2.043E+02  | 0.11 |     |
| In                                                     | 8           | 3447.02          | 45.52      | 0.50 | 2.051E+02  | 0.11 |     |
| Ba                                                     | 1           | 5073.00          | 271.46     | 0.24 | 3.288E+01  | 0.37 |     |
| Ba                                                     | 2           | 5075.25          | 274.00     | 0.23 | 3.432E+01  | 0.51 |     |
| Ba                                                     | 3           | 5079.95          | 275.05     | 0.25 | 3.372E+01  | 0.51 |     |
| Ba                                                     | 4           | 5080.52          | 273.91     | 0.23 | 3.457E+01  | 0.46 |     |
| Ba                                                     | 5           | 5073.26          | 271.32     | 0.24 | 3.289E+01  | 0.37 |     |
| Ba                                                     | 6           | 5075.25          | 274.16     | 0.23 | 3.430E+01  | 0.51 |     |
| Ba                                                     | 7           | 5079.82          | 275.18     | 0.25 | 3.376E+01  | 0.51 |     |
| Ba                                                     | 8           | 5080.43          | 273.74     | 0.23 | 3.453E+01  | 0.46 |     |

#-----

# CRYSTAL DATA

#-----

\_pd\_phase\_name 'Ba2In2O5\_NMR\_013'  
\_cell\_length\_a 6.233384  
\_cell\_length\_b 16.896744  
\_cell\_length\_c 6.045330  
\_cell\_angle\_alpha 90.015399  
\_cell\_angle\_beta 90.023348  
\_cell\_angle\_gamma 89.999441  
\_symmetry\_space\_group\_name\_H-M 'P 1 '  
\_symmetry\_Int\_Tables\_number 1

loop\_  
\_symmetry\_equiv\_pos\_as\_xyz  
'x, y, z'

loop\_  
\_atom\_site\_label  
\_atom\_site\_fract\_x  
\_atom\_site\_fract\_y  
\_atom\_site\_fract\_z  
O1 0.059749 0.138487 1.023076  
O2 0.946386 0.862191 1.022921  
O3 0.946220 0.638447 0.023156  
O4 0.059494 0.362199 0.023226  
O5 0.559550 0.638458 0.523410  
O6 0.446251 0.362203 0.523017  
O7 0.446323 0.138469 0.523149  
O8 0.559592 0.862164 0.522896  
O9 0.871628 0.250280 0.624721  
O10 0.134781 0.750250 0.624762  
O11 0.371645 0.750278 0.124677  
O12 0.634860 0.250323 0.124804  
O13 0.257489 0.991829 0.246904  
O14 0.748334 0.008852 0.247141  
O15 0.748170 0.491825 0.247392  
O16 0.257289 0.508805 0.247182  
O17 0.757300 0.491807 0.747158  
O18 0.248188 0.508803 0.747424  
O19 0.248333 0.991800 0.747130  
O20 0.757502 0.008807 0.746901  
In1 0.937724 0.250305 0.969002  
In2 0.068317 0.750274 0.968852  
In3 0.437654 0.750274 0.468981  
In4 0.568318 0.250310 0.468869  
In5 0.002556 1.000198 0.001484  
In6 1.002401 0.500458 0.001710  
In7 0.502344 0.500176 0.501718  
In8 0.502574 1.000461 0.501464  
Ba1 0.019112 0.109799 0.498895  
Ba2 0.982694 0.890221 0.498578  
Ba3 0.982408 0.609890 0.499013  
Ba4 0.019087 0.390413 0.498913  
Ba5 0.519077 0.609805 -0.001055  
Ba6 0.482379 0.390326 -0.001020  
Ba7 0.482863 0.110033 -0.001534  
Ba8 0.519120 0.890423 0.998869

| Chemical Shielding and Electric Field Gradient Tensors |             |                  |            |      |            |      |     |
|--------------------------------------------------------|-------------|------------------|------------|------|------------|------|-----|
| Species                                                | Nucleus Ion | Shielding tensor |            |      | EFG Tensor |      | Eta |
|                                                        |             | Iso(ppm)         | Aniso(ppm) | Asym | Cq(MHz)    |      |     |
| O                                                      | 1           | 72.12            | -65.21     | 0.94 | -6.263E+00 | 0.13 |     |
| O                                                      | 2           | 74.72            | -63.09     | 0.74 | -6.254E+00 | 0.13 |     |
| O                                                      | 3           | 75.62            | -61.74     | 0.77 | -6.259E+00 | 0.13 |     |
| O                                                      | 4           | 71.11            | -66.26     | 0.93 | -6.257E+00 | 0.13 |     |
| O                                                      | 5           | 71.61            | -65.28     | 0.95 | -6.262E+00 | 0.13 |     |
| O                                                      | 6           | 74.80            | -63.20     | 0.75 | -6.252E+00 | 0.13 |     |
| O                                                      | 7           | 75.36            | -62.27     | 0.75 | -6.260E+00 | 0.13 |     |
| O                                                      | 8           | 71.15            | -66.48     | 0.93 | -6.257E+00 | 0.13 |     |
| O                                                      | 9           | 30.36            | 141.67     | 0.84 | -4.701E+00 | 0.89 |     |
| O                                                      | 10          | 33.23            | 137.61     | 0.87 | -4.705E+00 | 0.88 |     |
| O                                                      | 11          | 30.43            | 141.79     | 0.84 | -4.700E+00 | 0.89 |     |
| O                                                      | 12          | 33.29            | 137.65     | 0.87 | -4.706E+00 | 0.88 |     |
| O                                                      | 13          | 46.94            | -80.20     | 0.09 | -5.741E+00 | 0.05 |     |
| O                                                      | 14          | 46.61            | -80.93     | 0.05 | -5.739E+00 | 0.05 |     |
| O                                                      | 15          | 46.26            | -80.64     | 0.05 | -5.737E+00 | 0.05 |     |
| O                                                      | 16          | 47.05            | -80.79     | 0.08 | -5.743E+00 | 0.05 |     |
| O                                                      | 17          | 46.99            | -80.48     | 0.08 | -5.740E+00 | 0.05 |     |
| O                                                      | 18          | 46.59            | -81.34     | 0.05 | -5.739E+00 | 0.05 |     |
| O                                                      | 19          | 46.47            | -80.65     | 0.05 | -5.737E+00 | 0.05 |     |
| O                                                      | 20          | 47.15            | -80.92     | 0.08 | -5.743E+00 | 0.05 |     |
| In                                                     | 1           | 3068.14          | 333.57     | 0.42 | -1.970E+02 | 0.29 |     |
| In                                                     | 2           | 3068.25          | 335.42     | 0.42 | -1.970E+02 | 0.27 |     |
| In                                                     | 3           | 3068.24          | 332.99     | 0.42 | -1.969E+02 | 0.29 |     |
| In                                                     | 4           | 3068.00          | 335.42     | 0.42 | -1.969E+02 | 0.27 |     |
| In                                                     | 5           | 3447.75          | 44.55      | 0.55 | 2.043E+02  | 0.11 |     |
| In                                                     | 6           | 3447.99          | 44.88      | 0.58 | 2.039E+02  | 0.11 |     |
| In                                                     | 7           | 3447.98          | 44.73      | 0.58 | 2.040E+02  | 0.11 |     |
| In                                                     | 8           | 3447.69          | 44.42      | 0.55 | 2.043E+02  | 0.11 |     |
| Ba                                                     | 1           | 5075.82          | 273.95     | 0.23 | 3.335E+01  | 0.43 |     |
| Ba                                                     | 2           | 5077.88          | 271.31     | 0.24 | 3.293E+01  | 0.53 |     |
| Ba                                                     | 3           | 5076.75          | 267.52     | 0.24 | 3.304E+01  | 0.48 |     |
| Ba                                                     | 4           | 5076.62          | 277.20     | 0.23 | 3.350E+01  | 0.47 |     |
| Ba                                                     | 5           | 5075.77          | 274.04     | 0.23 | 3.324E+01  | 0.43 |     |
| Ba                                                     | 6           | 5077.56          | 270.87     | 0.24 | 3.326E+01  | 0.52 |     |
| Ba                                                     | 7           | 5076.76          | 268.22     | 0.24 | 3.266E+01  | 0.49 |     |
| Ba                                                     | 8           | 5077.02          | 276.90     | 0.22 | 3.357E+01  | 0.47 |     |

#=====

# CRYSTAL DATA

#-----

```
_pd_phase_name      'Ba2In2O5_NMR_014'
_cell_length_a      6.232604
_cell_length_b      16.910901
_cell_length_c      6.042180
_cell_angle_alpha   90.003979
_cell_angle_beta    89.993262
```

\_cell\_angle\_gamma 89.999457  
 \_symmetry\_space\_group\_name\_H-M 'P 1 '  
 \_symmetry\_Int\_Tables\_number 1

loop\_  
 \_symmetry\_equiv\_pos\_as\_xyz  
 'x, y, z'

loop\_  
 \_atom\_site\_label  
 \_atom\_site\_fract\_x  
 \_atom\_site\_fract\_y  
 \_atom\_site\_fract\_z

|     |           |          |           |
|-----|-----------|----------|-----------|
| O1  | 0.055591  | 0.138216 | 0.018915  |
| O2  | 0.942858  | 0.861978 | 1.018699  |
| O3  | 0.942841  | 0.638201 | 1.018736  |
| O4  | 0.055590  | 0.361957 | 1.018879  |
| O5  | 0.555587  | 0.638184 | 0.518694  |
| O6  | 0.442686  | 0.361973 | 0.518784  |
| O7  | 0.442633  | 0.138205 | 0.518777  |
| O8  | 0.555577  | 0.861981 | 0.518661  |
| O9  | 0.867521  | 0.250077 | 0.621208  |
| O10 | 0.130511  | 0.750072 | 0.621013  |
| O11 | 0.367798  | 0.750076 | 0.121042  |
| O12 | 0.630533  | 0.250073 | 0.121195  |
| O13 | 0.253624  | 0.991646 | 0.245113  |
| O14 | 0.744813  | 0.008551 | 0.245067  |
| O15 | 0.744803  | 0.491620 | 0.245065  |
| O16 | 0.253611  | 0.508516 | 0.245146  |
| O17 | 0.753653  | 0.491603 | 0.745107  |
| O18 | 0.244835  | 0.508522 | 0.745105  |
| O19 | 0.244813  | 0.991650 | 0.745073  |
| O20 | 0.753618  | 0.008571 | 0.745103  |
| In1 | 0.933781  | 0.250077 | 0.965732  |
| In2 | 0.064623  | 0.750078 | 0.965696  |
| In3 | 0.433819  | 0.750077 | 0.465674  |
| In4 | 0.564356  | 0.250078 | 0.465806  |
| In5 | -0.000668 | 0.000139 | -0.000409 |
| In6 | -0.000652 | 0.500037 | 0.999618  |
| In7 | 0.499266  | 0.500110 | 0.499692  |
| In8 | 0.499259  | 1.000064 | 0.499674  |
| Ba1 | 1.017828  | 0.109862 | 0.498015  |
| Ba2 | 0.981428  | 0.890341 | 0.498423  |
| Ba3 | 0.981433  | 0.609719 | 0.498428  |
| Ba4 | 0.017891  | 0.390215 | 0.498082  |
| Ba5 | 0.518170  | 0.609749 | 0.998448  |
| Ba6 | 0.481412  | 0.390330 | -0.001588 |
| Ba7 | 0.481418  | 0.109727 | 0.998419  |
| Ba8 | 0.518176  | 0.890309 | -0.001559 |

---

Chemical Shielding and Electric Field Gradient Tensors

| Nucleus | Shielding tensor |          |            | EFG Tensor |            | Eta  |
|---------|------------------|----------|------------|------------|------------|------|
| Species | Ion              | Iso(ppm) | Aniso(ppm) | Asym       | Cq(MHz)    |      |
| O       | 1                | 75.08    | -63.66     | 0.85       | -6.268E+00 | 0.12 |
| O       | 2                | 74.14    | -65.29     | 0.89       | -6.269E+00 | 0.12 |
| O       | 3                | 74.15    | -64.61     | 0.90       | -6.271E+00 | 0.12 |

|    |    |         |        |      |            |      |  |
|----|----|---------|--------|------|------------|------|--|
| O  | 4  | 74.82   | -64.06 | 0.84 | -6.267E+00 | 0.12 |  |
| O  | 5  | 75.05   | -63.85 | 0.86 | -6.270E+00 | 0.12 |  |
| O  | 6  | 73.94   | -64.97 | 0.90 | -6.269E+00 | 0.12 |  |
| O  | 7  | 74.33   | -64.91 | 0.90 | -6.270E+00 | 0.12 |  |
| O  | 8  | 74.89   | -64.26 | 0.85 | -6.268E+00 | 0.12 |  |
| O  | 9  | 31.18   | 140.99 | 0.85 | -4.696E+00 | 0.89 |  |
| O  | 10 | 30.56   | 142.01 | 0.84 | -4.692E+00 | 0.89 |  |
| O  | 11 | 31.44   | 140.98 | 0.85 | -4.694E+00 | 0.89 |  |
| O  | 12 | 30.67   | 141.97 | 0.84 | -4.694E+00 | 0.89 |  |
| O  | 13 | 46.93   | -80.20 | 0.07 | -5.740E+00 | 0.06 |  |
| O  | 14 | 46.88   | -80.72 | 0.08 | -5.741E+00 | 0.06 |  |
| O  | 15 | 47.04   | -80.88 | 0.08 | -5.740E+00 | 0.05 |  |
| O  | 16 | 47.07   | -80.63 | 0.07 | -5.740E+00 | 0.06 |  |
| O  | 17 | 47.06   | -80.57 | 0.07 | -5.739E+00 | 0.06 |  |
| O  | 18 | 47.33   | -80.37 | 0.08 | -5.742E+00 | 0.06 |  |
| O  | 19 | 47.51   | -80.32 | 0.08 | -5.741E+00 | 0.05 |  |
| O  | 20 | 47.23   | -80.71 | 0.07 | -5.740E+00 | 0.06 |  |
| In | 1  | 3069.35 | 336.98 | 0.42 | -1.975E+02 | 0.29 |  |
| In | 2  | 3069.46 | 336.48 | 0.42 | -1.974E+02 | 0.30 |  |
| In | 3  | 3069.62 | 336.87 | 0.42 | -1.975E+02 | 0.30 |  |
| In | 4  | 3069.10 | 337.65 | 0.42 | -1.979E+02 | 0.30 |  |
| In | 5  | 3447.78 | 45.22  | 0.54 | 2.056E+02  | 0.11 |  |
| In | 6  | 3448.27 | 45.57  | 0.57 | 2.057E+02  | 0.11 |  |
| In | 7  | 3448.24 | 45.20  | 0.57 | 2.055E+02  | 0.11 |  |
| In | 8  | 3447.72 | 45.21  | 0.56 | 2.056E+02  | 0.11 |  |
| Ba | 1  | 5077.46 | 274.35 | 0.24 | 3.366E+01  | 0.48 |  |
| Ba | 2  | 5077.78 | 275.96 | 0.24 | 3.401E+01  | 0.47 |  |
| Ba | 3  | 5077.61 | 275.34 | 0.24 | 3.395E+01  | 0.46 |  |
| Ba | 4  | 5077.75 | 274.93 | 0.24 | 3.374E+01  | 0.49 |  |
| Ba | 5  | 5077.85 | 273.76 | 0.24 | 3.387E+01  | 0.47 |  |
| Ba | 6  | 5077.60 | 276.11 | 0.23 | 3.400E+01  | 0.47 |  |
| Ba | 7  | 5077.30 | 275.46 | 0.24 | 3.397E+01  | 0.46 |  |
| Ba | 8  | 5077.96 | 274.42 | 0.24 | 3.393E+01  | 0.48 |  |

#=====

# CRYSTAL DATA

#-----

\_pd\_phase\_name            'Ba2In2O5\_NMR\_015'  
\_cell\_length\_a            6.232835  
\_cell\_length\_b            16.909712  
\_cell\_length\_c            6.04237  
\_cell\_angle\_alpha        90.010176  
\_cell\_angle\_beta         90.001283  
\_cell\_angle\_gamma        89.999931  
\_symmetry\_space\_group\_name\_H-M    'P 1 '  
\_symmetry\_Int\_Tables\_number        1

loop\_  
\_symmetry\_equiv\_pos\_as\_xyz  
'x, y, z'

loop\_

| _atom_site_label | _atom_site_fract_x | _atom_site_fract_y | _atom_site_fract_z |
|------------------|--------------------|--------------------|--------------------|
| O1               | 0.056584           | 0.138308           | 0.01908            |
| O2               | 0.943845           | 0.862081           | 1.019029           |
| O3               | 0.943802           | 0.638304           | 0.019148           |
| O4               | 0.056545           | 0.362087           | 1.018969           |
| O5               | 0.556614           | 0.638307           | 0.5191             |
| O6               | 0.443851           | 0.362084           | 0.518963           |
| O7               | 0.443797           | 0.138309           | 0.519081           |
| O8               | 0.556571           | 0.862074           | 0.519056           |
| O9               | 0.868858           | 0.250174           | 0.621272           |
| O10              | 0.131591           | 0.750161           | 0.621354           |
| O11              | 0.368838           | 0.750169           | 0.12134            |
| O12              | 0.631596           | 0.250167           | 0.121281           |
| O13              | 0.254588           | 0.99174            | 0.245298           |
| O14              | 0.745776           | 0.008624           | 0.245321           |
| O15              | 0.745784           | 0.491738           | 0.245279           |
| O16              | 0.254622           | 0.508633           | 0.245271           |
| O17              | 0.754614           | 0.491755           | 0.745256           |
| O18              | 0.245783           | 0.508632           | 0.745301           |
| O19              | 0.245769           | 0.991748           | 0.74529            |
| O20              | 0.754602           | 0.00863            | 0.745299           |
| In1              | 0.934794           | 0.250176           | 0.965898           |
| In2              | 0.065604           | 0.75017            | 0.965959           |
| In3              | 0.434788           | 0.750169           | 0.465965           |
| In4              | 0.565622           | 0.250173           | 0.465902           |
| In5              | 1.000147           | 1.000182           | -0.000158          |
| In6              | 0.000181           | 0.500201           | -0.000172          |
| In7              | 0.500161           | 0.500186           | 0.499828           |
| In8              | 0.500177           | 1.000194           | 0.499844           |
| Ba1              | 0.018415           | 0.109773           | 0.498481           |
| Ba2              | 0.981676           | 0.890349           | 0.498468           |
| Ba3              | 0.981685           | 0.609778           | 0.498485           |
| Ba4              | 0.018434           | 0.39036            | 0.49846            |
| Ba5              | 0.518422           | 0.609772           | -0.001517          |
| Ba6              | 0.481672           | 0.390351           | -0.001534          |
| Ba7              | 0.481684           | 0.109778           | -0.001513          |
| Ba8              | 0.518431           | 0.890355           | -0.001533          |

---

| Chemical Shielding and Electric Field Gradient Tensors |     |                  |            |      |            |      |  |
|--------------------------------------------------------|-----|------------------|------------|------|------------|------|--|
| -----                                                  |     |                  |            |      |            |      |  |
| Nucleus                                                |     | Shielding tensor |            |      | EFG Tensor |      |  |
| Species                                                | Ion | Iso(ppm)         | Aniso(ppm) | Asym | Cq(MHz)    | Eta  |  |
| O                                                      | 1   | 75.00            | -64.17     | 0.89 | -6.271E+00 | 0.12 |  |
| O                                                      | 2   | 74.62            | -64.48     | 0.87 | -6.266E+00 | 0.12 |  |
| O                                                      | 3   | 75.06            | -63.64     | 0.89 | -6.270E+00 | 0.12 |  |
| O                                                      | 4   | 74.36            | -64.67     | 0.88 | -6.267E+00 | 0.12 |  |
| O                                                      | 5   | 74.66            | -64.11     | 0.90 | -6.270E+00 | 0.12 |  |
| O                                                      | 6   | 74.51            | -64.61     | 0.87 | -6.266E+00 | 0.12 |  |
| O                                                      | 7   | 75.07            | -64.18     | 0.88 | -6.270E+00 | 0.12 |  |
| O                                                      | 8   | 74.27            | -64.92     | 0.88 | -6.266E+00 | 0.12 |  |
| O                                                      | 9   | 31.00            | 141.65     | 0.84 | -4.694E+00 | 0.89 |  |
| O                                                      | 10  | 31.24            | 141.29     | 0.84 | -4.694E+00 | 0.89 |  |
| O                                                      | 11  | 31.09            | 141.68     | 0.84 | -4.693E+00 | 0.89 |  |
| O                                                      | 12  | 31.28            | 141.42     | 0.84 | -4.694E+00 | 0.89 |  |

|    |    |         |        |      |            |      |  |
|----|----|---------|--------|------|------------|------|--|
| O  | 13 | 46.91   | -80.60 | 0.08 | -5.740E+00 | 0.05 |  |
| O  | 14 | 46.91   | -80.53 | 0.08 | -5.741E+00 | 0.05 |  |
| O  | 15 | 46.95   | -80.73 | 0.08 | -5.739E+00 | 0.05 |  |
| O  | 16 | 46.86   | -80.68 | 0.08 | -5.741E+00 | 0.05 |  |
| O  | 17 | 47.10   | -80.86 | 0.08 | -5.740E+00 | 0.05 |  |
| O  | 18 | 46.97   | -80.89 | 0.08 | -5.741E+00 | 0.05 |  |
| O  | 19 | 47.01   | -80.81 | 0.08 | -5.740E+00 | 0.05 |  |
| O  | 20 | 47.07   | -80.66 | 0.08 | -5.741E+00 | 0.05 |  |
| In | 1  | 3069.20 | 336.51 | 0.42 | -1.974E+02 | 0.30 |  |
| In | 2  | 3069.28 | 336.49 | 0.42 | -1.974E+02 | 0.30 |  |
| In | 3  | 3069.26 | 336.10 | 0.42 | -1.974E+02 | 0.30 |  |
| In | 4  | 3069.13 | 336.61 | 0.42 | -1.974E+02 | 0.30 |  |
| In | 5  | 3447.34 | 45.04  | 0.52 | 2.053E+02  | 0.11 |  |
| In | 6  | 3447.88 | 45.41  | 0.55 | 2.053E+02  | 0.11 |  |
| In | 7  | 3447.84 | 45.21  | 0.55 | 2.053E+02  | 0.11 |  |
| In | 8  | 3447.28 | 44.92  | 0.53 | 2.054E+02  | 0.11 |  |
| Ba | 1  | 5077.30 | 274.10 | 0.24 | 3.382E+01  | 0.46 |  |
| Ba | 2  | 5078.03 | 275.31 | 0.24 | 3.393E+01  | 0.48 |  |
| Ba | 3  | 5077.46 | 273.55 | 0.24 | 3.378E+01  | 0.46 |  |
| Ba | 4  | 5077.93 | 275.97 | 0.24 | 3.395E+01  | 0.48 |  |
| Ba | 5  | 5077.46 | 273.97 | 0.24 | 3.383E+01  | 0.46 |  |
| Ba | 6  | 5078.04 | 275.40 | 0.24 | 3.393E+01  | 0.49 |  |
| Ba | 7  | 5077.35 | 273.72 | 0.24 | 3.381E+01  | 0.46 |  |
| Ba | 8  | 5077.94 | 275.70 | 0.24 | 3.393E+01  | 0.48 |  |

---

**Excited state structures (Brownmillerite type with stacked Vac channels in ...OctTetOctTet... fashion):**

#=====

# CRYSTAL DATA

#-----

\_pd\_phase\_name 'Ba2In2O5\_NMR\_001'  
\_cell\_length\_a 6.189607  
\_cell\_length\_b 17.075117  
\_cell\_length\_c 6.044900  
\_cell\_angle\_alpha 90.038876  
\_cell\_angle\_beta 89.986622  
\_cell\_angle\_gamma 90.009552  
\_symmetry\_space\_group\_name\_H-M 'P 1 '  
\_symmetry\_Int\_Tables\_number 1

loop\_  
\_symmetry\_equiv\_pos\_as\_xyz  
'x, y, z'

loop\_

| _atom_site_label | _atom_site_fract_x | _atom_site_fract_y | _atom_site_fract_z |
|------------------|--------------------|--------------------|--------------------|
| O1               | 0.046148           | 0.138062           | 0.022218           |
| O2               | 1.044206           | 0.862731           | 1.021505           |
| O3               | 1.044549           | 0.638332           | 1.021881           |
| O4               | 0.045575           | 0.362048           | 1.022313           |
| O5               | 0.457996           | 0.638263           | 0.521451           |
| O6               | 0.457709           | 0.362022           | 0.522093           |
| O7               | 0.457407           | 0.138098           | 0.523346           |
| O8               | 0.458305           | 0.862759           | 0.521354           |
| O9               | 0.880155           | 0.250335           | 0.617799           |
| O10              | 0.622436           | 0.750504           | 0.116503           |
| O11              | 0.879965           | 0.750468           | 0.616546           |
| O12              | 0.624674           | 0.249385           | 0.118557           |
| O13              | 0.258539           | 1.000434           | 0.245410           |
| O14              | 0.751376           | 0.000757           | 0.252114           |
| O15              | 0.752120           | 0.499968           | 0.252511           |
| O16              | 0.259338           | 0.499849           | 0.244773           |
| O17              | 0.750777           | 0.499949           | 0.752226           |
| O18              | 0.243444           | 0.500119           | 0.745061           |
| O19              | 0.243230           | 1.000347           | 0.745130           |
| O20              | 0.750849           | 0.000663           | 0.751968           |
| In1              | 0.932066           | 0.249943           | 0.965203           |
| In2              | 0.571795           | 0.750434           | 0.464400           |
| In3              | 0.930417           | 0.750439           | 0.964505           |
| In4              | 0.572206           | 0.249939           | 0.466022           |
| In5              | 0.998329           | 1.000419           | 0.002031           |
| In6              | 0.998587           | 0.500191           | 0.002019           |
| In7              | 0.503731           | 0.500093           | 0.502012           |
| In8              | 0.503546           | 0.000443           | 0.502099           |
| Ba1              | 0.018796           | 0.108210           | 0.499195           |
| Ba2              | 1.018809           | 0.892150           | 0.499096           |
| Ba3              | 1.018833           | 0.608209           | 0.499174           |
| Ba4              | 0.018748           | 0.392144           | 0.499103           |
| Ba5              | 0.481871           | 0.607980           | -0.000805          |
| Ba6              | 0.481305           | 0.389053           | -0.001036          |
| Ba7              | 0.481867           | 0.108149           | 0.999170           |
| Ba8              | 0.481707           | 0.892088           | -0.000896          |

---

| Chemical Shielding and Electric Field Gradient Tensors |     |                  |            |      |            |      |  |
|--------------------------------------------------------|-----|------------------|------------|------|------------|------|--|
| -----                                                  |     |                  |            |      |            |      |  |
| Nucleus                                                |     | Shielding tensor |            |      | EFG Tensor |      |  |
| Species                                                | Ion | Iso(ppm)         | Aniso(ppm) | Asym | Cq(MHz)    | Eta  |  |
| O                                                      | 1   | 76.03            | -67.99     | 0.60 | -6.202E+00 | 0.14 |  |
| O                                                      | 2   | 74.22            | -69.61     | 0.53 | -6.198E+00 | 0.14 |  |
| O                                                      | 3   | 74.62            | -67.21     | 0.53 | -6.217E+00 | 0.14 |  |
| O                                                      | 4   | 71.59            | -73.48     | 0.61 | -6.183E+00 | 0.14 |  |
| O                                                      | 5   | 75.23            | -65.98     | 0.49 | -6.220E+00 | 0.14 |  |
| O                                                      | 6   | 74.10            | -70.27     | 0.39 | -6.183E+00 | 0.14 |  |
| O                                                      | 7   | 76.77            | -66.19     | 0.46 | -6.198E+00 | 0.14 |  |
| O                                                      | 8   | 75.62            | -68.67     | 0.46 | -6.203E+00 | 0.14 |  |
| O                                                      | 9   | 29.96            | 143.69     | 0.75 | -4.546E+00 | 0.99 |  |
| O                                                      | 10  | 30.09            | 143.30     | 0.74 | -4.556E+00 | 0.99 |  |
| O                                                      | 11  | 28.28            | 145.61     | 0.73 | -4.559E+00 | 0.98 |  |
| O                                                      | 12  | 25.89            | 149.02     | 0.76 | -4.589E+00 | 0.97 |  |



|    |    |         |        |      |            |      |  |
|----|----|---------|--------|------|------------|------|--|
| O  | 13 | 21.18   | -73.77 | 0.09 | -5.756E+00 | 0.01 |  |
| O  | 14 | 79.91   | -96.71 | 0.15 | -5.718E+00 | 0.08 |  |
| O  | 15 | 80.83   | -95.15 | 0.15 | -5.739E+00 | 0.10 |  |
| O  | 16 | 23.16   | -72.58 | 0.14 | -5.773E+00 | 0.02 |  |
| O  | 17 | 80.97   | -95.74 | 0.16 | -5.733E+00 | 0.09 |  |
| O  | 18 | 22.41   | -72.95 | 0.12 | -5.782E+00 | 0.01 |  |
| O  | 19 | 21.69   | -73.44 | 0.09 | -5.759E+00 | 0.02 |  |
| O  | 20 | 79.90   | -96.69 | 0.15 | -5.713E+00 | 0.08 |  |
| In | 1  | 3073.78 | 331.39 | 0.35 | -2.058E+02 | 0.44 |  |
| In | 2  | 3079.93 | 326.07 | 0.34 | -2.028E+02 | 0.47 |  |
| In | 3  | 3079.83 | 322.03 | 0.34 | -2.011E+02 | 0.48 |  |
| In | 4  | 3074.06 | 330.48 | 0.35 | -2.042E+02 | 0.44 |  |
| In | 5  | 3444.58 | -26.39 | 0.97 | 2.218E+02  | 0.10 |  |
| In | 6  | 3449.75 | -30.36 | 0.82 | 2.282E+02  | 0.10 |  |
| In | 7  | 3450.77 | 29.37  | 0.91 | 2.267E+02  | 0.10 |  |
| In | 8  | 3445.05 | 26.25  | 0.91 | 2.208E+02  | 0.10 |  |
| Ba | 1  | 5087.40 | 302.01 | 0.35 | -3.765E+01 | 0.24 |  |
| Ba | 2  | 5089.77 | 306.40 | 0.36 | -3.987E+01 | 0.19 |  |
| Ba | 3  | 5089.82 | 300.44 | 0.37 | -3.730E+01 | 0.23 |  |
| Ba | 4  | 5087.16 | 305.29 | 0.36 | -3.861E+01 | 0.22 |  |
| Ba | 5  | 5094.10 | 294.68 | 0.38 | -3.860E+01 | 0.22 |  |
| Ba | 6  | 5097.53 | 315.22 | 0.36 | -4.271E+01 | 0.25 |  |
| Ba | 7  | 5082.39 | 303.19 | 0.36 | -3.807E+01 | 0.24 |  |
| Ba | 8  | 5089.97 | 304.64 | 0.37 | -3.969E+01 | 0.21 |  |

=====

# CRYSTAL DATA

#-----

\_pd\_phase\_name 'Ba2In2O5\_NMR\_002'  
\_cell\_length\_a 6.188994  
\_cell\_length\_b 17.084015  
\_cell\_length\_c 6.042483  
\_cell\_angle\_alpha 89.994784  
\_cell\_angle\_beta 90.000921  
\_cell\_angle\_gamma 89.974265  
\_symmetry\_space\_group\_name\_H-M 'P 1 '  
\_symmetry\_Int\_Tables\_number 1

loop\_  
\_symmetry\_equiv\_pos\_as\_xyz  
'x, y, z'

loop\_  
\_atom\_site\_label  
\_atom\_site\_fract\_x  
\_atom\_site\_fract\_y  
\_atom\_site\_fract\_z  
O1 0.045223 0.138279 1.020756  
O2 1.042364 0.862358 1.016792  
O3 1.042488 0.637560 1.017426  
O4 0.045479 0.361842 0.019147  
O5 0.457936 0.637580 0.517302

|     |           |          |           |
|-----|-----------|----------|-----------|
| O6  | 0.455472  | 0.361867 | 0.520450  |
| O7  | 0.455163  | 0.138282 | 0.519409  |
| O8  | 0.458095  | 0.862362 | 0.517798  |
| O9  | 0.877102  | 0.249122 | 0.616997  |
| O10 | 0.620444  | 0.749976 | 0.111833  |
| O11 | 0.879660  | 0.749826 | 0.612004  |
| O12 | 0.623546  | 0.251004 | 0.116990  |
| O13 | 0.258158  | 1.000560 | 0.243011  |
| O14 | 0.750816  | 0.000993 | 0.250133  |
| O15 | 0.750198  | 0.498967 | 0.249494  |
| O16 | 0.257263  | 0.499588 | 0.243078  |
| O17 | 0.749759  | 0.499044 | 0.749552  |
| O18 | 0.242247  | 0.499439 | 0.742558  |
| O19 | 0.243201  | 1.000448 | 0.743512  |
| O20 | 0.750257  | 0.001086 | 0.749967  |
| In1 | 0.930866  | 0.250044 | 0.964219  |
| In2 | 0.571230  | 0.749955 | 0.460267  |
| In3 | 0.928951  | 0.749924 | 0.960546  |
| In4 | 0.569754  | 0.250064 | 0.464216  |
| In5 | -0.002185 | 0.000343 | 0.000363  |
| In6 | 0.997428  | 0.499609 | -0.000353 |
| In7 | 0.502601  | 0.499687 | 0.499720  |
| In8 | 0.502982  | 1.000446 | 0.499942  |
| Ba1 | 0.018418  | 0.107925 | 0.498665  |
| Ba2 | 0.018709  | 0.892002 | 0.498630  |
| Ba3 | 1.018431  | 0.607183 | 0.496575  |
| Ba4 | 0.019018  | 0.388940 | 0.498510  |
| Ba5 | 0.481519  | 0.607444 | -0.003367 |
| Ba6 | 0.481711  | 0.392049 | -0.001419 |
| Ba7 | 0.481113  | 0.111114 | 0.998575  |
| Ba8 | 0.481720  | 0.892817 | -0.003216 |

=====

Chemical Shielding and Electric Field Gradient Tensors |

| Nucleus<br>Species | Ion | Shielding tensor |            |      | EFG Tensor |      | Eta |
|--------------------|-----|------------------|------------|------|------------|------|-----|
|                    |     | Iso(ppm)         | Aniso(ppm) | Asym | Cq(MHz)    |      |     |
| O                  | 1   | 73.97            | -72.01     | 0.60 | -6.181E+00 | 0.13 |     |
| O                  | 2   | 76.11            | -67.43     | 0.51 | -6.228E+00 | 0.13 |     |
| O                  | 3   | 74.85            | -66.44     | 0.51 | -6.229E+00 | 0.13 |     |
| O                  | 4   | 75.74            | -70.60     | 0.51 | -6.182E+00 | 0.14 |     |
| O                  | 5   | 75.73            | -66.30     | 0.48 | -6.230E+00 | 0.13 |     |
| O                  | 6   | 74.36            | -72.00     | 0.58 | -6.180E+00 | 0.13 |     |
| O                  | 7   | 76.00            | -70.39     | 0.49 | -6.186E+00 | 0.14 |     |
| O                  | 8   | 74.30            | -67.81     | 0.51 | -6.224E+00 | 0.13 |     |
| O                  | 9   | 26.03            | 149.57     | 0.77 | -4.569E+00 | 0.98 |     |
| O                  | 10  | 30.50            | 142.73     | 0.72 | -4.545E+00 | 0.99 |     |
| O                  | 11  | 28.50            | 145.41     | 0.71 | -4.552E+00 | 0.99 |     |
| O                  | 12  | 26.27            | 149.32     | 0.77 | -4.568E+00 | 0.98 |     |
| O                  | 13  | 23.65            | -72.20     | 0.12 | -5.770E+00 | 0.02 |     |
| O                  | 14  | 81.70            | -95.67     | 0.16 | -5.726E+00 | 0.09 |     |
| O                  | 15  | 80.71            | -96.52     | 0.17 | -5.722E+00 | 0.09 |     |
| O                  | 16  | 21.75            | -73.27     | 0.15 | -5.772E+00 | 0.01 |     |
| O                  | 17  | 80.92            | -95.93     | 0.16 | -5.723E+00 | 0.09 |     |
| O                  | 18  | 23.12            | -72.76     | 0.11 | -5.765E+00 | 0.02 |     |
| O                  | 19  | 21.24            | -73.08     | 0.15 | -5.775E+00 | 0.01 |     |
| O                  | 20  | 80.49            | -96.65     | 0.17 | -5.726E+00 | 0.09 |     |
| In                 | 1   | 3069.14          | 338.74     | 0.36 | -2.083E+02 | 0.42 |     |

|    |   |         |        |      |            |      |  |
|----|---|---------|--------|------|------------|------|--|
| In | 2 | 3084.42 | 319.71 | 0.33 | -1.998E+02 | 0.50 |  |
| In | 3 | 3084.10 | 320.52 | 0.33 | -2.000E+02 | 0.51 |  |
| In | 4 | 3068.95 | 339.25 | 0.36 | -2.084E+02 | 0.41 |  |
| In | 5 | 3447.82 | -28.02 | 0.97 | 2.268E+02  | 0.09 |  |
| In | 6 | 3448.13 | 29.26  | 0.92 | 2.256E+02  | 0.10 |  |
| In | 7 | 3447.77 | -28.67 | 0.93 | 2.254E+02  | 0.09 |  |
| In | 8 | 3448.57 | 29.11  | 0.91 | 2.268E+02  | 0.10 |  |
| Ba | 1 | 5080.09 | 307.22 | 0.33 | -3.839E+01 | 0.25 |  |
| Ba | 2 | 5092.91 | 303.78 | 0.35 | -3.971E+01 | 0.21 |  |
| Ba | 3 | 5093.99 | 296.91 | 0.36 | -4.007E+01 | 0.18 |  |
| Ba | 4 | 5094.92 | 316.84 | 0.32 | -4.234E+01 | 0.25 |  |
| Ba | 5 | 5091.31 | 298.83 | 0.36 | -3.816E+01 | 0.22 |  |
| Ba | 6 | 5079.37 | 308.19 | 0.33 | -3.849E+01 | 0.25 |  |
| Ba | 7 | 5095.13 | 315.28 | 0.33 | -4.214E+01 | 0.26 |  |
| Ba | 8 | 5094.81 | 296.15 | 0.36 | -3.986E+01 | 0.17 |  |

#=====

# CRYSTAL DATA

#-----

\_pd\_phase\_name 'Ba2In2O5\_NMR\_003'  
\_cell\_length\_a 6.190145  
\_cell\_length\_b 17.068291  
\_cell\_length\_c 6.045983  
\_cell\_angle\_alpha 89.945584  
\_cell\_angle\_beta 90.005994  
\_cell\_angle\_gamma 90.001464  
\_symmetry\_space\_group\_name\_H-M 'P 1 '  
\_symmetry\_Int\_Tables\_number 1

loop\_  
\_symmetry\_equiv\_pos\_as\_xyz  
'x, y, z'

loop\_  
\_atom\_site\_label  
\_atom\_site\_fract\_x  
\_atom\_site\_fract\_y  
\_atom\_site\_fract\_z  
O1 0.046685 0.138676 1.025740  
O2 1.045091 0.861721 0.024575  
O3 1.044653 0.637245 1.024208  
O4 0.047241 0.362164 1.026506  
O5 0.458977 0.637211 0.524170  
O6 0.456315 0.362202 0.526435  
O7 0.456867 0.138628 0.525631  
O8 0.458574 0.861769 0.524482  
O9 0.878542 0.250730 0.621996  
O10 0.623068 0.749489 0.118863  
O11 0.880700 0.749497 0.618795  
O12 0.625136 0.250721 0.122069  
O13 0.260201 1.000491 0.245844

|     |           |          |           |
|-----|-----------|----------|-----------|
| O14 | 0.753063  | 0.000684 | 0.254766  |
| O15 | 0.752075  | 0.499120 | 0.253920  |
| O16 | 0.259520  | 0.499687 | 0.246553  |
| O17 | 0.750984  | 0.499121 | 0.753714  |
| O18 | 0.243127  | 0.499689 | 0.746440  |
| O19 | 0.242545  | 1.000490 | 0.745786  |
| O20 | 0.750103  | 0.000690 | 0.754504  |
| In1 | 0.932211  | 0.250585 | 0.968812  |
| In2 | 0.572440  | 0.749600 | 0.466618  |
| In3 | 0.930984  | 0.749595 | 0.966608  |
| In4 | 0.571119  | 0.250583 | 0.468816  |
| In5 | -0.001185 | 1.000255 | 0.003442  |
| In6 | 0.998728  | 0.499663 | 0.003483  |
| In7 | 0.503835  | 0.499662 | 0.503482  |
| In8 | 0.503788  | 0.000262 | 0.503448  |
| Ba1 | 0.019227  | 0.110911 | 0.499295  |
| Ba2 | 1.018895  | 0.892127 | 0.499545  |
| Ba3 | 1.018934  | 0.607878 | 0.499454  |
| Ba4 | 0.018849  | 0.391952 | 0.499535  |
| Ba5 | 0.481846  | 0.607955 | -0.000529 |
| Ba6 | 0.481935  | 0.391875 | -0.000448 |
| Ba7 | 0.481522  | 0.110989 | -0.000676 |
| Ba8 | 0.481886  | 0.892049 | -0.000442 |

---



---

| Chemical Shielding and Electric Field Gradient Tensors |                  |          |            |            |            |      |  |
|--------------------------------------------------------|------------------|----------|------------|------------|------------|------|--|
| -----                                                  |                  |          |            |            |            |      |  |
| Nucleus                                                | Shielding tensor |          |            | EFG Tensor |            |      |  |
| Species                                                | Ion              | Iso(ppm) | Aniso(ppm) | Asym       | Cq(MHz)    | Eta  |  |
| O                                                      | 1                | 69.53    | -76.00     | 0.53       | -6.155E+00 | 0.14 |  |
| O                                                      | 2                | 72.37    | -67.35     | 0.54       | -6.214E+00 | 0.14 |  |
| O                                                      | 3                | 73.14    | -69.82     | 0.51       | -6.190E+00 | 0.14 |  |
| O                                                      | 4                | 75.15    | -68.00     | 0.57       | -6.179E+00 | 0.15 |  |
| O                                                      | 5                | 74.71    | -67.98     | 0.41       | -6.197E+00 | 0.14 |  |
| O                                                      | 6                | 76.62    | -66.27     | 0.47       | -6.186E+00 | 0.15 |  |
| O                                                      | 7                | 70.92    | -73.85     | 0.44       | -6.162E+00 | 0.14 |  |
| O                                                      | 8                | 74.16    | -65.89     | 0.43       | -6.222E+00 | 0.14 |  |
| O                                                      | 9                | 26.56    | 147.59     | 0.77       | -4.579E+00 | 0.97 |  |
| O                                                      | 10               | 30.62    | 141.63     | 0.75       | -4.563E+00 | 0.98 |  |
| O                                                      | 11               | 28.90    | 143.93     | 0.73       | -4.558E+00 | 0.98 |  |
| O                                                      | 12               | 28.34    | 145.25     | 0.79       | -4.583E+00 | 0.97 |  |
| O                                                      | 13               | 24.07    | -72.03     | 0.06       | -5.789E+00 | 0.01 |  |
| O                                                      | 14               | 81.37    | -95.03     | 0.12       | -5.752E+00 | 0.11 |  |
| O                                                      | 15               | 79.37    | -97.45     | 0.14       | -5.711E+00 | 0.08 |  |
| O                                                      | 16               | 21.68    | -74.04     | 0.07       | -5.749E+00 | 0.02 |  |
| O                                                      | 17               | 79.83    | -97.12     | 0.14       | -5.712E+00 | 0.08 |  |
| O                                                      | 18               | 21.46    | -74.25     | 0.09       | -5.746E+00 | 0.02 |  |
| O                                                      | 19               | 23.85    | -72.17     | 0.07       | -5.786E+00 | 0.01 |  |
| O                                                      | 20               | 81.95    | -94.63     | 0.12       | -5.752E+00 | 0.10 |  |
| In                                                     | 1                | 3068.18  | 333.54     | 0.37       | -2.067E+02 | 0.41 |  |
| In                                                     | 2                | 3080.37  | 323.28     | 0.34       | -2.016E+02 | 0.47 |  |
| In                                                     | 3                | 3079.97  | 319.67     | 0.34       | -2.006E+02 | 0.48 |  |
| In                                                     | 4                | 3068.81  | 336.38     | 0.37       | -2.077E+02 | 0.40 |  |
| In                                                     | 5                | 3453.49  | -32.19     | 0.87       | 2.325E+02  | 0.10 |  |
| In                                                     | 6                | 3444.21  | -27.69     | 0.92       | 2.202E+02  | 0.11 |  |
| In                                                     | 7                | 3444.94  | 26.61      | 0.93       | 2.186E+02  | 0.11 |  |
| In                                                     | 8                | 3453.96  | 30.32      | 0.97       | 2.308E+02  | 0.11 |  |
| Ba                                                     | 1                | 5093.44  | 316.51     | 0.38       | -4.123E+01 | 0.24 |  |

|    |   |         |        |      |            |      |  |
|----|---|---------|--------|------|------------|------|--|
| Ba | 2 | 5094.43 | 296.02 | 0.40 | -3.760E+01 | 0.21 |  |
| Ba | 3 | 5089.16 | 306.77 | 0.39 | -3.955E+01 | 0.18 |  |
| Ba | 4 | 5080.62 | 305.79 | 0.36 | -3.728E+01 | 0.25 |  |
| Ba | 5 | 5089.85 | 303.55 | 0.40 | -3.926E+01 | 0.22 |  |
| Ba | 6 | 5081.48 | 302.19 | 0.38 | -3.692E+01 | 0.28 |  |
| Ba | 7 | 5094.20 | 313.42 | 0.39 | -4.101E+01 | 0.28 |  |
| Ba | 8 | 5095.29 | 292.59 | 0.41 | -3.719E+01 | 0.24 |  |

#=====

# CRYSTAL DATA

#-----

\_pd\_phase\_name 'Ba2In2O5\_NMR\_004'  
\_cell\_length\_a 6.190146  
\_cell\_length\_b 17.058396  
\_cell\_length\_c 6.048013  
\_cell\_angle\_alpha 90.015723  
\_cell\_angle\_beta 90.013269  
\_cell\_angle\_gamma 90.009894  
\_symmetry\_space\_group\_name\_H-M 'P 1 '  
\_symmetry\_Int\_Tables\_number 1

loop\_  
\_symmetry\_equiv\_pos\_as\_xyz  
'x, y, z'

loop\_  
\_atom\_site\_label  
\_atom\_site\_fract\_x  
\_atom\_site\_fract\_y  
\_atom\_site\_fract\_z  
O1 0.044781 0.137980 0.030146  
O2 1.041685 0.862323 0.027518  
O3 1.041788 0.637688 0.027700  
O4 0.044486 0.361067 0.030411  
O5 0.455509 0.637710 0.527826  
O6 0.452005 0.361107 0.529470  
O7 0.451977 0.137958 0.530373  
O8 0.455596 0.862247 0.527892  
O9 0.873136 0.249878 0.626784  
O10 0.619930 0.750037 0.121770  
O11 0.877420 0.750006 0.621759  
O12 0.622057 0.248943 0.126035  
O13 0.257691 1.000192 0.247805  
O14 0.749918 0.000995 0.256241  
O15 0.750849 0.498624 0.256975  
O16 0.258580 0.499165 0.247179  
O17 0.746752 0.498536 0.757149  
O18 0.239485 0.499079 0.747425  
O19 0.239435 1.000450 0.747488  
O20 0.747159 0.000890 0.756490  
In1 0.929047 0.249470 0.972764

|     |           |          |           |
|-----|-----------|----------|-----------|
| In2 | 0.569538  | 0.749961 | 0.469323  |
| In3 | 0.928061  | 0.749971 | 0.969249  |
| In4 | 0.566716  | 0.249476 | 0.472003  |
| In5 | -0.003635 | 1.000250 | 1.005167  |
| In6 | 0.996584  | 0.499291 | 0.005240  |
| In7 | 0.501415  | 0.499318 | 0.505183  |
| In8 | 0.501262  | 0.000157 | 0.505147  |
| Ba1 | 0.018585  | 0.110962 | 0.499755  |
| Ba2 | 1.018150  | 0.892150 | 0.499962  |
| Ba3 | 1.018266  | 0.607783 | 0.499963  |
| Ba4 | 1.018457  | 0.388964 | 0.499777  |
| Ba5 | 0.481169  | 0.607716 | -0.000040 |
| Ba6 | 0.480884  | 0.388910 | -0.000225 |
| Ba7 | 0.481293  | 0.107898 | -0.000046 |
| Ba8 | 0.481117  | 0.891933 | -0.000078 |

---



---

| Chemical Shielding and Electric Field Gradient Tensors |     |                  |            |      |            |      |  |
|--------------------------------------------------------|-----|------------------|------------|------|------------|------|--|
| -----                                                  |     |                  |            |      |            |      |  |
| Nucleus                                                |     | Shielding tensor |            |      | EFG Tensor |      |  |
| Species                                                | Ion | Iso(ppm)         | Aniso(ppm) | Asym | Cq(MHz)    | Eta  |  |
| O                                                      | 1   | 73.77            | -69.62     | 0.41 | -6.153E+00 | 0.15 |  |
| O                                                      | 2   | 72.87            | -66.97     | 0.43 | -6.201E+00 | 0.15 |  |
| O                                                      | 3   | 72.16            | -66.75     | 0.42 | -6.208E+00 | 0.15 |  |
| O                                                      | 4   | 70.63            | -72.76     | 0.43 | -6.145E+00 | 0.15 |  |
| O                                                      | 5   | 70.89            | -68.25     | 0.48 | -6.202E+00 | 0.15 |  |
| O                                                      | 6   | 69.35            | -74.66     | 0.55 | -6.149E+00 | 0.15 |  |
| O                                                      | 7   | 70.92            | -72.75     | 0.61 | -6.153E+00 | 0.15 |  |
| O                                                      | 8   | 72.32            | -68.71     | 0.46 | -6.196E+00 | 0.15 |  |
| O                                                      | 9   | 25.32            | 147.78     | 0.82 | -4.616E+00 | 0.95 |  |
| O                                                      | 10  | 29.69            | 141.87     | 0.74 | -4.565E+00 | 0.98 |  |
| O                                                      | 11  | 31.45            | 139.28     | 0.75 | -4.565E+00 | 0.98 |  |
| O                                                      | 12  | 29.27            | 143.47     | 0.81 | -4.576E+00 | 0.97 |  |
| O                                                      | 13  | 22.32            | -73.81     | 0.11 | -5.762E+00 | 0.02 |  |
| O                                                      | 14  | 80.38            | -96.83     | 0.14 | -5.726E+00 | 0.09 |  |
| O                                                      | 15  | 80.95            | -94.93     | 0.11 | -5.747E+00 | 0.10 |  |
| O                                                      | 16  | 24.23            | -72.46     | 0.06 | -5.778E+00 | 0.01 |  |
| O                                                      | 17  | 81.06            | -95.56     | 0.11 | -5.752E+00 | 0.10 |  |
| O                                                      | 18  | 24.06            | -73.01     | 0.05 | -5.776E+00 | 0.01 |  |
| O                                                      | 19  | 23.10            | -73.24     | 0.11 | -5.753E+00 | 0.02 |  |
| O                                                      | 20  | 79.86            | -96.64     | 0.14 | -5.734E+00 | 0.09 |  |
| In                                                     | 1   | 3061.78          | 337.94     | 0.38 | -2.082E+02 | 0.37 |  |
| In                                                     | 2   | 3079.23          | 316.18     | 0.34 | -1.992E+02 | 0.48 |  |
| In                                                     | 3   | 3079.43          | 319.73     | 0.34 | -2.009E+02 | 0.47 |  |
| In                                                     | 4   | 3062.17          | 337.40     | 0.39 | -2.097E+02 | 0.38 |  |
| In                                                     | 5   | 3447.06          | 29.40      | 0.88 | 2.224E+02  | 0.12 |  |
| In                                                     | 6   | 3452.13          | -31.67     | 0.98 | 2.288E+02  | 0.12 |  |
| In                                                     | 7   | 3451.67          | -33.39     | 0.89 | 2.298E+02  | 0.12 |  |
| In                                                     | 8   | 3446.01          | -30.14     | 0.85 | 2.240E+02  | 0.12 |  |
| Ba                                                     | 1   | 5088.27          | 316.66     | 0.39 | -4.041E+01 | 0.32 |  |
| Ba                                                     | 2   | 5093.79          | 296.45     | 0.43 | -3.837E+01 | 0.22 |  |
| Ba                                                     | 3   | 5095.42          | 295.33     | 0.44 | -3.745E+01 | 0.25 |  |
| Ba                                                     | 4   | 5086.36          | 315.37     | 0.41 | -3.975E+01 | 0.31 |  |
| Ba                                                     | 5   | 5095.00          | 297.26     | 0.44 | -3.777E+01 | 0.21 |  |
| Ba                                                     | 6   | 5091.64          | 313.69     | 0.40 | -3.938E+01 | 0.29 |  |
| Ba                                                     | 7   | 5078.50          | 305.48     | 0.40 | -3.613E+01 | 0.27 |  |
| Ba                                                     | 8   | 5089.37          | 302.32     | 0.43 | -3.718E+01 | 0.23 |  |

---



---

### 3. References for supplementary information

1. K. J. D. MacKenzie and M. E. Smith, *Multinuclear Solid State NMR of Inorganic Materials*, Pergamon Press, 2002.
2. M. E. Smith and E. R. H. van Eck, *Prog. Nucl. Magn. Reson. Spectrosc.*, 1999, **34**, 159-201.
3. F. Chen, G. Ma, R. G. Cavell, V. V. Terskikh and R. E. Wasylshen, *Chem. Commun.*, 2008, 5933–5935.
4. K. Yamada, K. Kumano and T. Okuda, *Solid State Ionics*, 2005, **176**, 823-829.
5. T. J. Bastow and G. W. West, *J. Phys.: Condens. Matter*, 2003, **15**, 8389-8406.
